# Supplementary material for: Temporal patterns of damage and decay kinetics of DNA retrieved from plant herbarium specimens
Source: PubMed Central journal article supplement (PMC4929915; doi:10.1098/rsos.160239), 2016-06-22
Supplement: rsos160239supp1.pdf [file rsos160239supp1.pdf]

**Fig. S1**

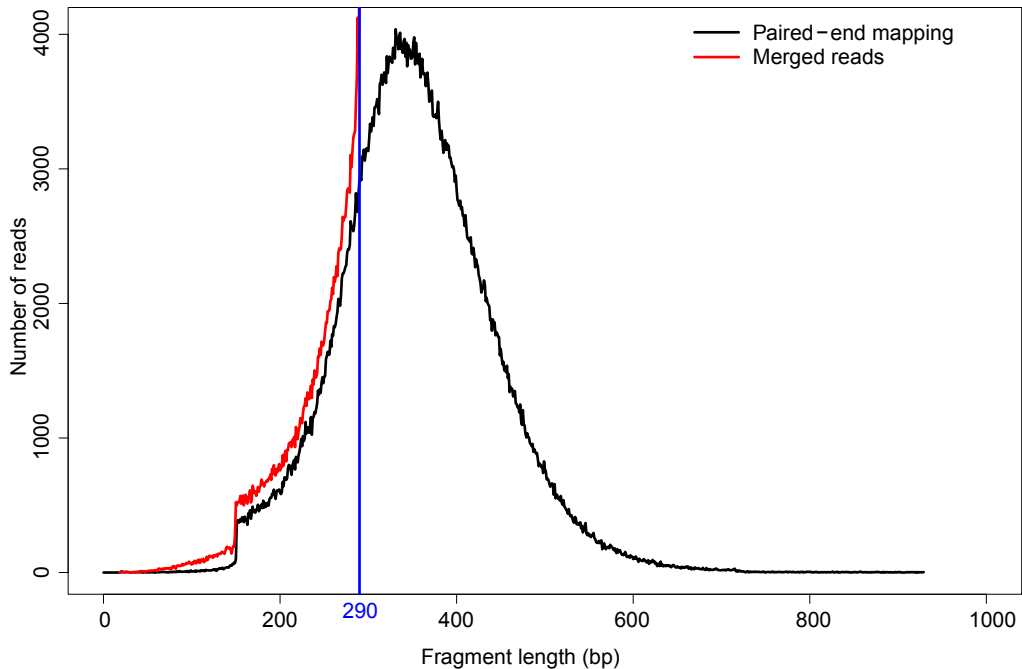

Fig. S2

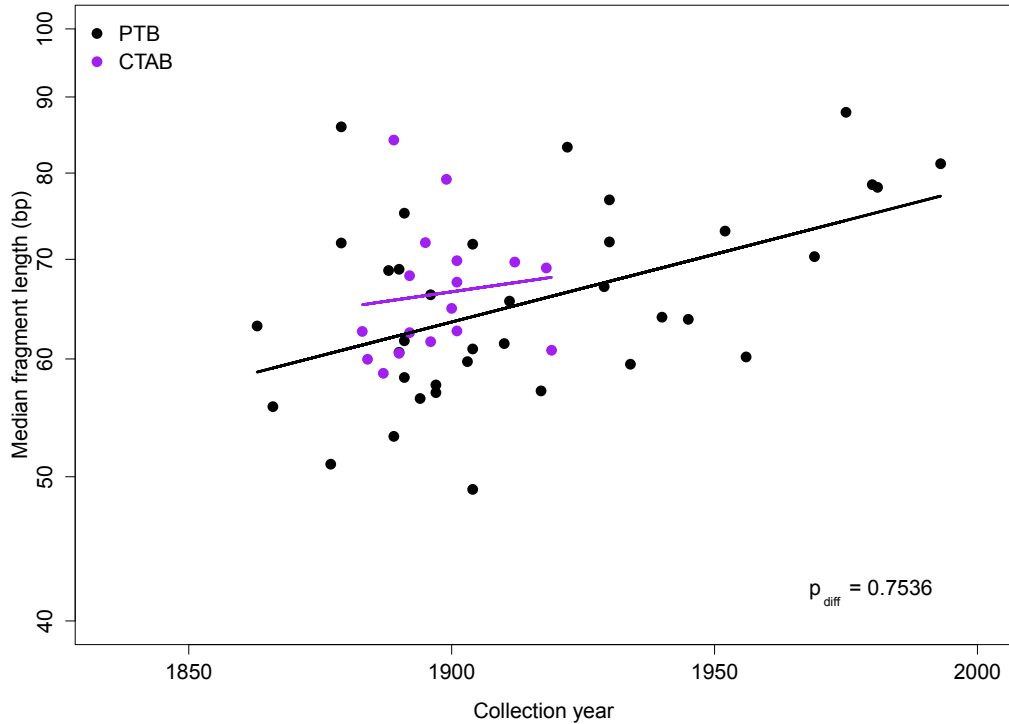

Fig. S3

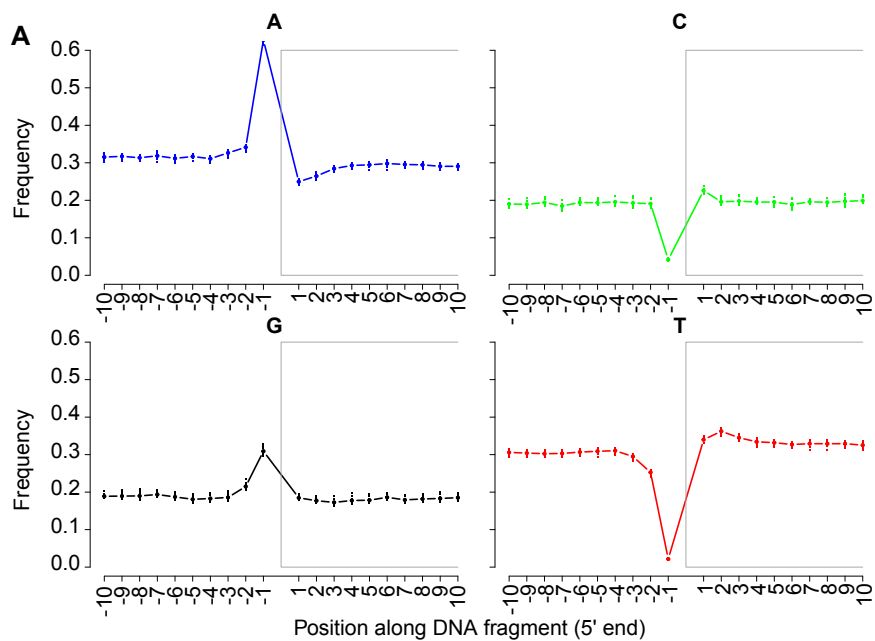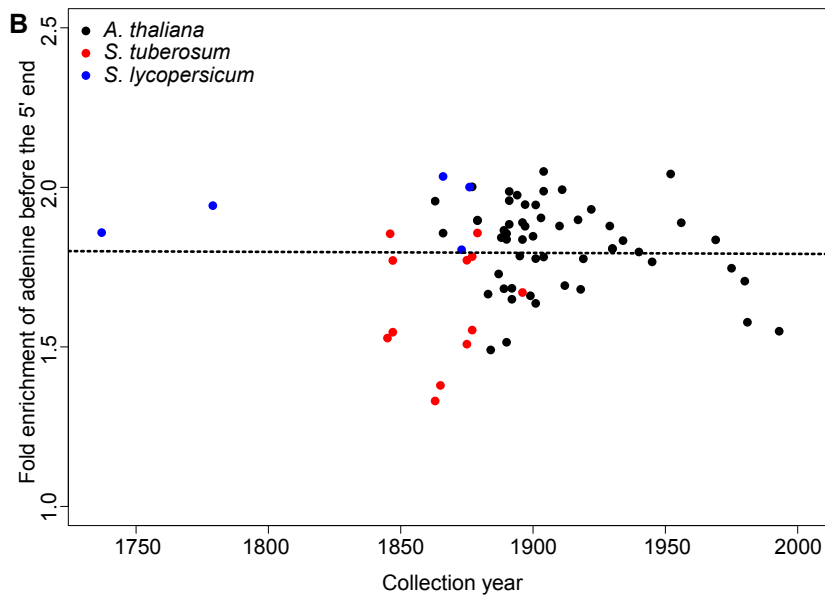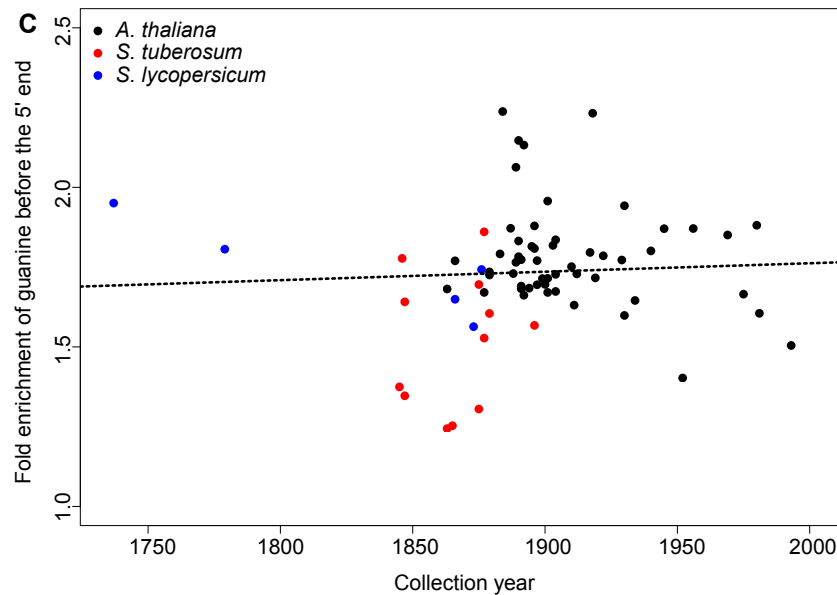

**Fig. S4**

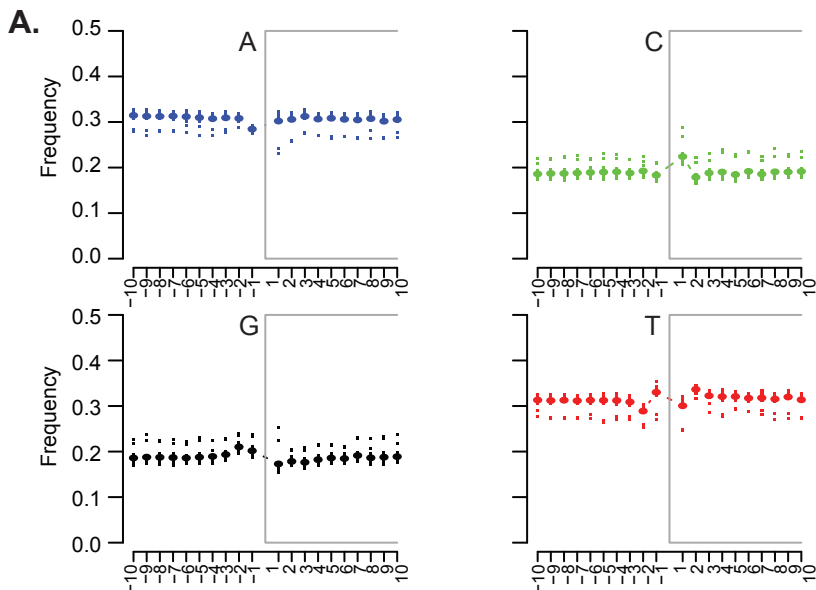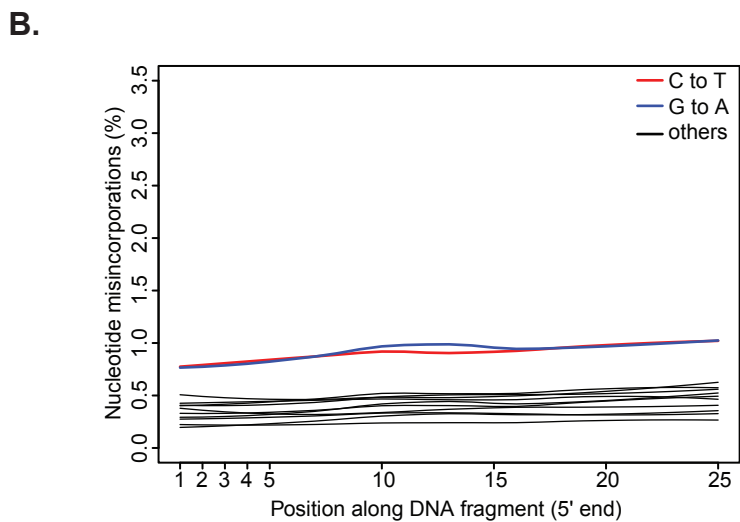

Fig. S5

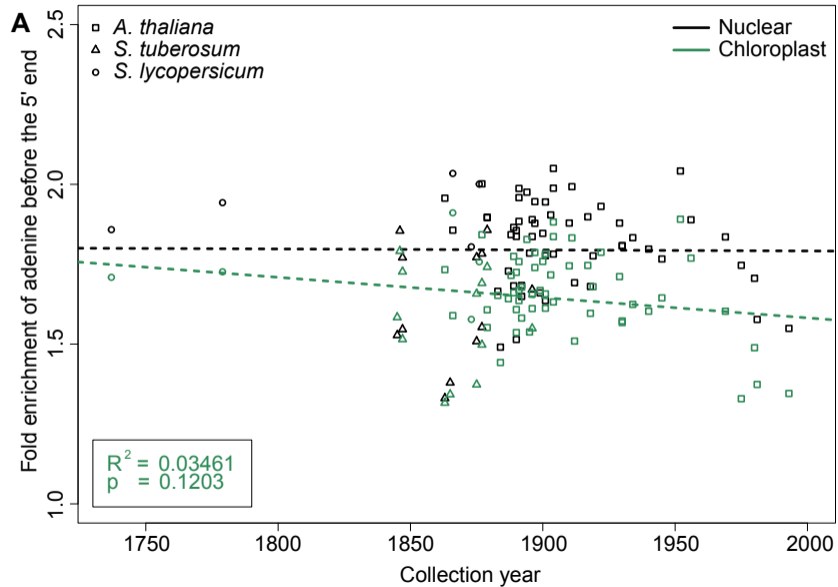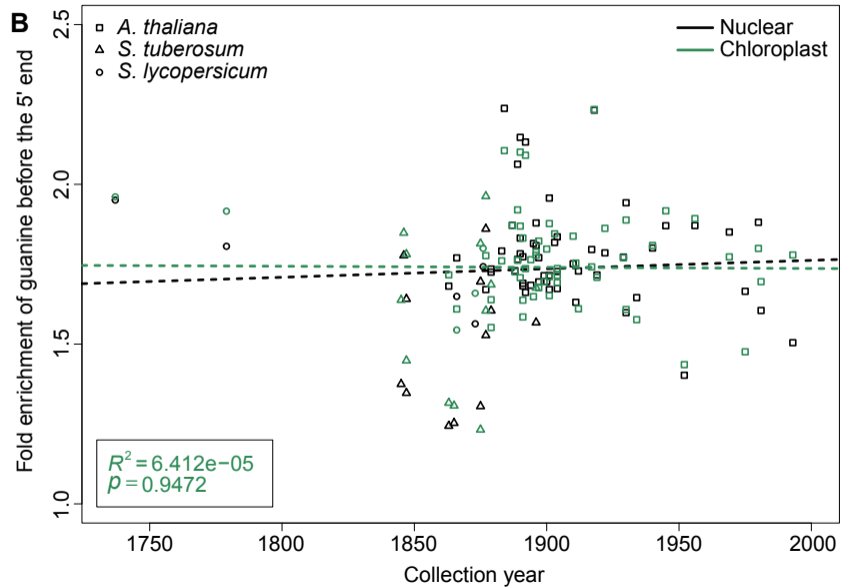

Fig. S6

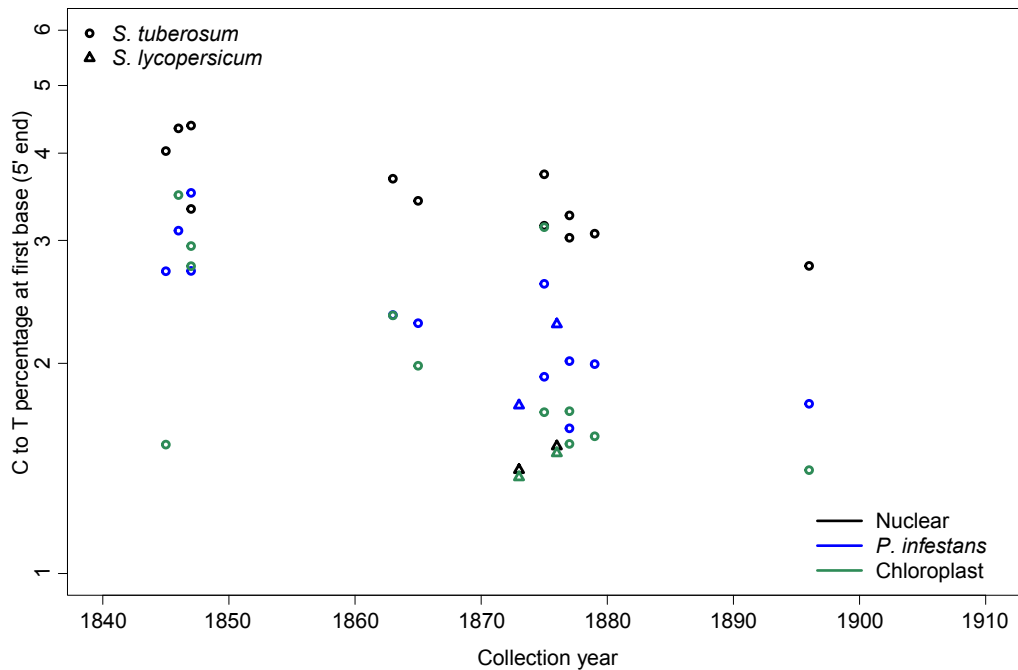

**Fig. S7**

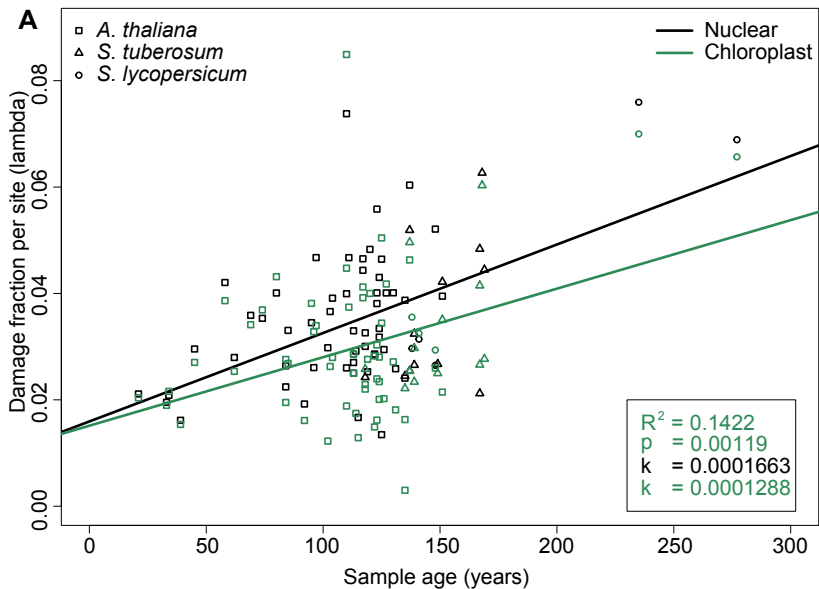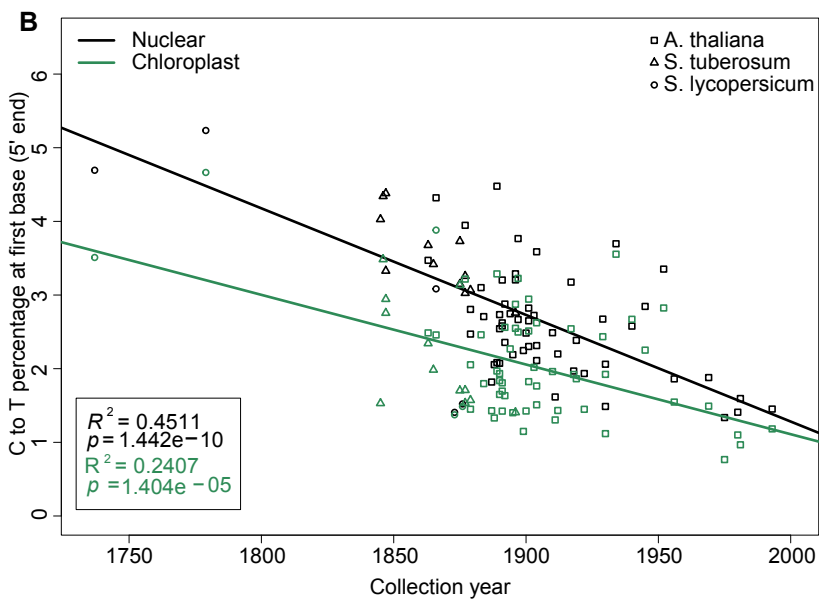

**Table S1.** Provenance of herbaria samples.

| <b>ID</b>    | <b>Country of origin</b> | <b>Collection year</b> | <b>Species</b>     | <b>Reference</b> |
|--------------|--------------------------|------------------------|--------------------|------------------|
| BH0000052681 | USA                      | 1919                   | <i>A. thaliana</i> | 1                |
| BH0000061407 | USA                      | 1890                   | <i>A. thaliana</i> | 1                |
| BH0000061409 | USA                      | 1892                   | <i>A. thaliana</i> | 1                |
| BH0000061416 | USA                      | 1892                   | <i>A. thaliana</i> | 1                |
| BH0000061457 | USA                      | 1900                   | <i>A. thaliana</i> | 1                |
| BH0000061454 | USA                      | 1884                   | <i>A. thaliana</i> | 1                |
| BH0000061397 | USA                      | 1899                   | <i>A. thaliana</i> | 1                |
| BH0000061417 | USA                      | 1912                   | <i>A. thaliana</i> | 1                |
| BH0000061449 | USA                      | 1901                   | <i>A. thaliana</i> | 1                |
| BH0000061420 | USA                      | 1896                   | <i>A. thaliana</i> | 1                |
| BH0000061395 | USA                      | 1883                   | <i>A. thaliana</i> | 1                |
| BH0000061424 | USA                      | 1895                   | <i>A. thaliana</i> | 1                |
| BH0000061393 | USA                      | 1918                   | <i>A. thaliana</i> | 1                |
| BH0000061399 | USA                      | 1901                   | <i>A. thaliana</i> | 1                |
| BH0000061448 | USA                      | 1901                   | <i>A. thaliana</i> | 1                |
| BH0000061418 | USA                      | 1887                   | <i>A. thaliana</i> | 1                |
| BH0000061406 | USA                      | 1889                   | <i>A. thaliana</i> | 1                |
| OSU46488     | USA                      | 1917                   | <i>A. thaliana</i> | 2                |
| OSU13896     | USA                      | 1930                   | <i>A. thaliana</i> | 2                |
| OSU13900     | USA                      | 1934                   | <i>A. thaliana</i> | 2                |
| OSU54623     | USA                      | 1956                   | <i>A. thaliana</i> | 2                |
| OSU79944     | USA                      | 1911                   | <i>A. thaliana</i> | 2                |
| OSU183663    | USA                      | 1969                   | <i>A. thaliana</i> | 2                |



|            |     |      |                    |   |
|------------|-----|------|--------------------|---|
| OSU361885  | USA | 1930 | <i>A. thaliana</i> | 2 |
| OSU150287  | USA | 1980 | <i>A. thaliana</i> | 2 |
| OSU163761  | USA | 1981 | <i>A. thaliana</i> | 2 |
| OSU364632  | USA | 1993 | <i>A. thaliana</i> | 2 |
| UNC54051   | USA | 1945 | <i>A. thaliana</i> | 3 |
| UNC25707   | USA | 1940 | <i>A. thaliana</i> | 3 |
| UNC63978   | USA | 1910 | <i>A. thaliana</i> | 3 |
| CT79391    | USA | 1904 | <i>A. thaliana</i> | 4 |
| CT79409    | USA | 1929 | <i>A. thaliana</i> | 4 |
| CT79389    | USA | 1975 | <i>A. thaliana</i> | 4 |
| 176849CFM  | USA | 1904 | <i>A. thaliana</i> | 5 |
| 531679CFM  | USA | 1922 | <i>A. thaliana</i> | 5 |
| 1507461CFM | USA | 1952 | <i>A. thaliana</i> | 5 |
| NY102365   | USA | 1903 | <i>A. thaliana</i> | 6 |
| NY1365344  | USA | 1890 | <i>A. thaliana</i> | 6 |
| NY888124   | USA | 1863 | <i>A. thaliana</i> | 6 |
| NY1365363  | USA | 1888 | <i>A. thaliana</i> | 6 |
| NY888144   | USA | 1866 | <i>A. thaliana</i> | 6 |
| NY1365364  | USA | 1889 | <i>A. thaliana</i> | 6 |
| NY888134   | USA | 1877 | <i>A. thaliana</i> | 6 |
| NY1365332  | USA | 1890 | <i>A. thaliana</i> | 6 |
| NY1365337  | USA | 1891 | <i>A. thaliana</i> | 6 |
| NY1365370  | USA | 1897 | <i>A. thaliana</i> | 6 |
| NY1365333  | USA | 1894 | <i>A. thaliana</i> | 6 |
| NY1365374  | USA | 1896 | <i>A. thaliana</i> | 6 |
| NY102364   | USA | 1904 | <i>A. thaliana</i> | 6 |
| NY1365375  | USA | 1897 | <i>A. thaliana</i> | 6 |

|                         |         |      |                        |    |
|-------------------------|---------|------|------------------------|----|
| NY888141                | USA     | 1879 | <i>A. thaliana</i>     | 6  |
| NY1365354               | USA     | 1891 | <i>A. thaliana</i>     | 6  |
| NY888141                | USA     | 1879 | <i>A. thaliana</i>     | 6  |
| NY1365354               | USA     | 1891 | <i>A. thaliana</i>     | 6  |
| KM177509                | England | 1865 | <i>S. tuberosum</i>    | 7  |
| KM177517                | Wales   | 1875 | <i>S. tuberosum</i>    | 7  |
| KM177514                | Ireland | 1847 | <i>S. tuberosum</i>    | 7  |
| KM177500                | England | 1845 | <i>S. tuberosum</i>    | 7  |
| KM177513                | Ireland | 1846 | <i>S. tuberosum</i>    | 7  |
| KM177548                | England | 1847 | <i>S. tuberosum</i>    | 7  |
| M-0182898               | Germany | 1863 | <i>S. tuberosum</i>    | 8  |
| M-0182906               | Germany | 1877 | <i>S. tuberosum</i>    | 8  |
| M-0182907               | Germany | 1875 | <i>S. tuberosum</i>    | 8  |
| M-0182896               | Germany | 1877 | <i>S. tuberosum</i>    | 8  |
| M-0182903               | Canada  | 1896 | <i>S. tuberosum</i>    | 8  |
| M-0182904               | Austria | 1879 | <i>S. tuberosum</i>    | 8  |
| BM000777791             | UK      | 1866 | <i>S. lycopersicum</i> | 9  |
| BM000815937             | UK      | 1737 | <i>S. lycopersicum</i> | 9  |
| BM000849510             | UK      | 1779 | <i>S. lycopersicum</i> | 9  |
| M-0182897               | USA     | 1876 | <i>S. lycopersicum</i> | 8  |
| M-0182900               | Germany | 1873 | <i>S. lycopersicum</i> | 8  |
| <i>Modern herbarium</i> |         |      |                        |    |
| INTHRR_108              | USA     | 2014 | <i>A. thaliana</i>     | 10 |
| INTHRR_110              | USA     | 2014 | <i>A. thaliana</i>     | 10 |
| INTHRR_54               | USA     | 2014 | <i>A. thaliana</i>     | 10 |
| MAAA_16                 | USA     | 2014 | <i>A. thaliana</i>     | 10 |
| MAAA_41                 | USA     | 2014 | <i>A. thaliana</i>     | 10 |

|          |     |      |                    |    |
|----------|-----|------|--------------------|----|
| MAAA_61  | USA | 2014 | <i>A. thaliana</i> | 10 |
| MDTCR_32 | USA | 2014 | <i>A. thaliana</i> | 10 |
| MDTCR_42 | USA | 2014 | <i>A. thaliana</i> | 10 |
| MDTCR_51 | USA | 2014 | <i>A. thaliana</i> | 10 |
| NCARS_32 | USA | 2014 | <i>A. thaliana</i> | 10 |
| NCARS_51 | USA | 2014 | <i>A. thaliana</i> | 10 |
| NCARS_9  | USA | 2014 | <i>A. thaliana</i> | 10 |
| NYBG_154 | USA | 2014 | <i>A. thaliana</i> | 10 |
| NYBG_157 | USA | 2014 | <i>A. thaliana</i> | 10 |
| NYBG_169 | USA | 2014 | <i>A. thaliana</i> | 10 |

\* 1. Cornell Bailey Hortorium; 2. Ohio State University Herbarium; 3. University of North Carolina Herbarium; 4. University of Connecticut Herbarium; 5. Chicago Field Museum; 6. New York Botanical Garden; 7. Kew Royal Botanical Garden; 8. Botanische Staatssammlung München; 9. Natural History Museum, London; 10. Max Planck Institute for Developmental Biology collection.

**Table S2.** Sequencing strategy and summary statistics.

| <b>ID</b>    | <b>Read type</b> | <b>Number raw read pairs</b> | <b>Percentage merged reads</b> | <b>Percentage of reads mapped to reference</b> |
|--------------|------------------|------------------------------|--------------------------------|------------------------------------------------|
| BH0000052681 | 2x101            | 4,070,122                    | 99.7                           | 53.5                                           |
| BH0000061407 | 2x101            | 4,083,714                    | 99.7                           | 28.4                                           |
| BH0000061409 | 2x101            | 4,316,387                    | 99.5                           | 66.5                                           |
| BH0000061416 | 2x101            | 3,927,269                    | 99.5                           | 71.3                                           |
| BH0000061457 | 2x101            | 478,438                      | 99.4                           | 74.6                                           |
| BH0000061454 | 2x101            | 497,373                      | 99.4                           | 66.6                                           |
| BH0000061397 | 2x101            | 589,715                      | 99.3                           | 89.5                                           |
| BH0000061417 | 2x101            | 3,310,517                    | 99.3                           | 76.9                                           |
| BH0000061449 | 2x101            | 4,873,199                    | 98.9                           | 92.4                                           |
| BH0000061420 | 2x101            | 4,137,492                    | 98.8                           | 81.0                                           |
| BH0000061395 | 2x101            | 608,442                      | 98.8                           | 87.6                                           |
| BH0000061424 | 2x101            | 560,391                      | 98.8                           | 83.4                                           |
| BH0000061393 | 2x101            | 583,208                      | 98.7                           | 81.7                                           |
| BH0000061399 | 2x101            | 5,030,578                    | 98.4                           | 88.5                                           |
| BH0000061448 | 2x101            | 3,250,580                    | 98.2                           | 60.9                                           |
| BH0000061418 | 2x101            | 4,110,260                    | 98.2                           | 72.3                                           |
| BH0000061406 | 2x101            | 5,525,374                    | 98.0                           | 85.2                                           |
| OSU46488     | 2x150            | 775,962                      | 97.9                           | 69.3                                           |
| OSU13896     | 2x150            | 1,222,514                    | 97.9                           | 73.5                                           |
| OSU13900     | 2x150            | 885,259                      | 97.8                           | 42.0                                           |
| OSU54623     | 2x150            | 814,706                      | 97.7                           | 69.1                                           |
| OSU79944     | 2x150            | 935,769                      | 97.7                           | 76.5                                           |

|            |       |           |      |      |
|------------|-------|-----------|------|------|
| OSU183663  | 2x150 | 941,643   | 97.5 | 68.6 |
| OSU361885  | 2x150 | 815,261   | 97.5 | 74.9 |
| OSU150287  | 2x150 | 1,100,356 | 97.3 | 68.8 |
| OSU163761  | 2x150 | 1,026,456 | 97.1 | 85.0 |
| OSU364632  | 2x150 | 992,421   | 97.1 | 68.7 |
| UNC54051   | 2x150 | 998,331   | 96.9 | 86.7 |
| UNC25707   | 2x150 | 741,049   | 96.7 | 71.6 |
| UNC63978   | 2x150 | 987,305   | 96.7 | 74.4 |
| CT79391    | 2x150 | 928,321   | 96.5 | 70.7 |
| CT79409    | 2x150 | 854,432   | 96.4 | 81.8 |
| CT79389    | 2x150 | 781,485   | 96.3 | 30.4 |
| 176849CFM  | 2x150 | 918,792   | 96.2 | 61.5 |
| 531679CFM  | 2x150 | 870,119   | 96.2 | 83.2 |
| 1507461CFM | 2x150 | 924,012   | 96.2 | 78.4 |
| NY102365   | 2x150 | 1,313,215 | 96.2 | 67.9 |
| NY1365344  | 2x150 | 1,496,570 | 96.0 | 80.6 |
| NY888124   | 2x150 | 2,083,306 | 95.9 | 70.0 |
| NY1365363  | 2x150 | 1,408,827 | 95.7 | 74.9 |
| NY888144   | 2x150 | 1,664,389 | 95.7 | 64.6 |
| NY1365364  | 2x150 | 1,660,257 | 95.7 | 60.3 |
| NY888134   | 2x150 | 1,333,231 | 95.6 | 75.9 |
| NY1365332  | 2x150 | 2,093,699 | 95.5 | 80.5 |
| NY1365337  | 2x150 | 1,773,246 | 95.5 | 81.3 |
| NY1365370  | 2x150 | 1,322,896 | 95.5 | 80.1 |
| NY1365333  | 2x150 | 1,937,923 | 95.2 | 79.4 |
| NY1365374  | 2x150 | 1,785,933 | 95.0 | 75.9 |
| NY102364   | 2x150 | 1,621,005 | 95.0 | 59.2 |

|                  |       |            |      |      |
|------------------|-------|------------|------|------|
| NY1365375        | 2x150 | 1,713,640  | 94.8 | 36.3 |
| NY888141         | 2x101 | 12,574,596 | 94.8 | 83.9 |
| NY1365354        | 2x101 | 10,832,427 | 94.8 | 66.5 |
| NY888141         | 2x101 | 9,605,582  | 94.7 | 86.1 |
| NY1365354        | 2x101 | 11,982,636 | 94.5 | 78.9 |
| KM177509         | 2x151 | 666,206    | 94.5 | 70.1 |
| KM177517         | 2x151 | 1,017,778  | 94.4 | 62.6 |
| KM177514         | 2x151 | 803,024    | 94.4 | 53.5 |
| KM177500         | 2x151 | 808,056    | 94.4 | 30.8 |
| KM177513         | 2x151 | 704,372    | 94.3 | 60.0 |
| KM177548         | 2x151 | 611,321    | 94.0 | 53.9 |
| M-0182898        | 2x101 | 2,206,547  | 93.9 | 65.0 |
| M-0182906        | 2x101 | 2,441,550  | 93.7 | 75.6 |
| M-0182907        | 2x101 | 2,224,182  | 93.2 | 75.4 |
| M-0182896        | 2x101 | 2,735,620  | 93.1 | 55.1 |
| M-0182903        | 2x101 | 3,668,118  | 92.9 | 65.3 |
| M-0182904        | 2x101 | 2,989,144  | 92.5 | 83.7 |
| BM000777791      | 2x101 | 533,872    | 91.9 | 91.9 |
| BM000815937      | 2x101 | 554,635    | 91.6 | 66.1 |
| BM000849510      | 2x101 | 519,254    | 87.1 | 68.9 |
| M-0182897        | 2x101 | 3,775,244  | 85.1 | 79.7 |
| M-0182900        | 2x101 | 1,860,985  | 83.5 | 85.7 |
| Modern Herbarium |       |            |      |      |
| INTHRR_108       | 2x150 | 1,013,210  | 17.1 | 85.5 |
| INTHRR_110       | 2x150 | 614,641    | 17.5 | 76.6 |
| INTHRR_54        | 2x150 | 1,035,098  | 17.7 | 80.8 |
| MAAA_16          | 2x150 | 816,998    | 18.5 | 90.3 |

|          |       |           |      |      |
|----------|-------|-----------|------|------|
| MAAA_41  | 2x150 | 994,861   | 19.8 | 68.0 |
| MAAA_61  | 2x150 | 1,029,669 | 18.7 | 90.0 |
| MDTCR_32 | 2x150 | 805,969   | 15.8 | 87.0 |
| MDTCR_42 | 2x150 | 977,367   | 21.1 | 91.5 |
| MDTCR_51 | 2x150 | 175,376   | 20.4 | 90.7 |
| NCARS_32 | 2x150 | 748,794   | 18.9 | 86.8 |
| NCARS_51 | 2x150 | 949,138   | 22.8 | 88.8 |
| NCARS_9  | 2x150 | 787,902   | 17.7 | 85.0 |
| NYBG_154 | 2x150 | 1,867,301 | 25.9 | 68.1 |
| NYBG_157 | 2x150 | 2,001,726 | 40.0 | 62.0 |
| NYBG_169 | 2x150 | 1,691,752 | 29.8 | 75.8 |
